# Supplementary material
Source: publisher site journal article supplement (https://www.dovepress.com/article/510918)

**Supplementary Tables**

**Table S1**. Physical appearance of RMP formulations after 6 months of accelerated storage.

| Formulation | Physical appearance | |
| --- | --- | --- |
| Zero time | Accelerated (6 m) |
| Liquid SNEDDS | Brown liquid | Brown liquid |
| RMP/THQ loaded Single-SNEPs | Free-flowing pellets | Pellet adherence |
| THQ loaded Single-SNEPs  (no-RMP) | Free-flowing pellets | Free-flowing pellets |
| 3L-SNEPs | Free-flowing pellets | Free-flowing pellets |
| 4L-SNEPs | Free-flowing pellets | Pellet adherence |
| 5L-SNEPs | Free-flowing pellets | Free-flowing pellets |

**Supplementary figures legend**

**Figure S1**. UPLC MS‒MS chromatograms of prednisolone, Ramiprilat and ramipril.


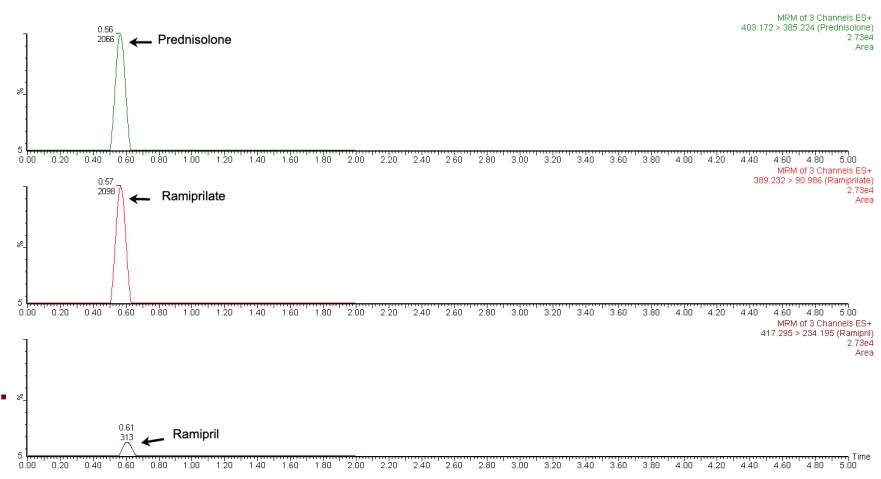


**Figure S2.** Calibration curves of ramipril in plasma (range = 10--500 ng/ml) [TOP] and ramiprilat in plasma (range = 20--1000 ng/ml) [BOTTOM].


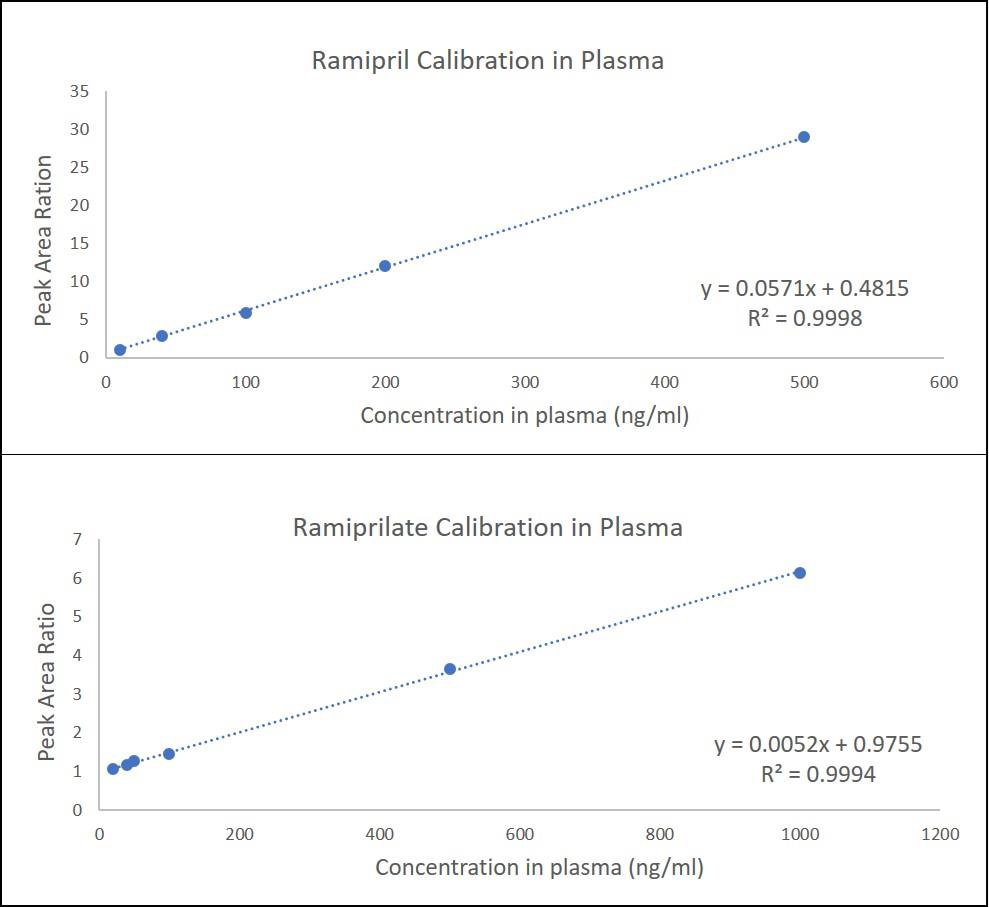

Supplement: Supplementary file 1 [file get_supplementary_file.php]
